# Supplementary material
Source: Springer Nature journal article supplement (https://www.springermedizin.de/resource/supplementary/12881_2011_921_MOESM2_ESM.pdf/9451584)

**A**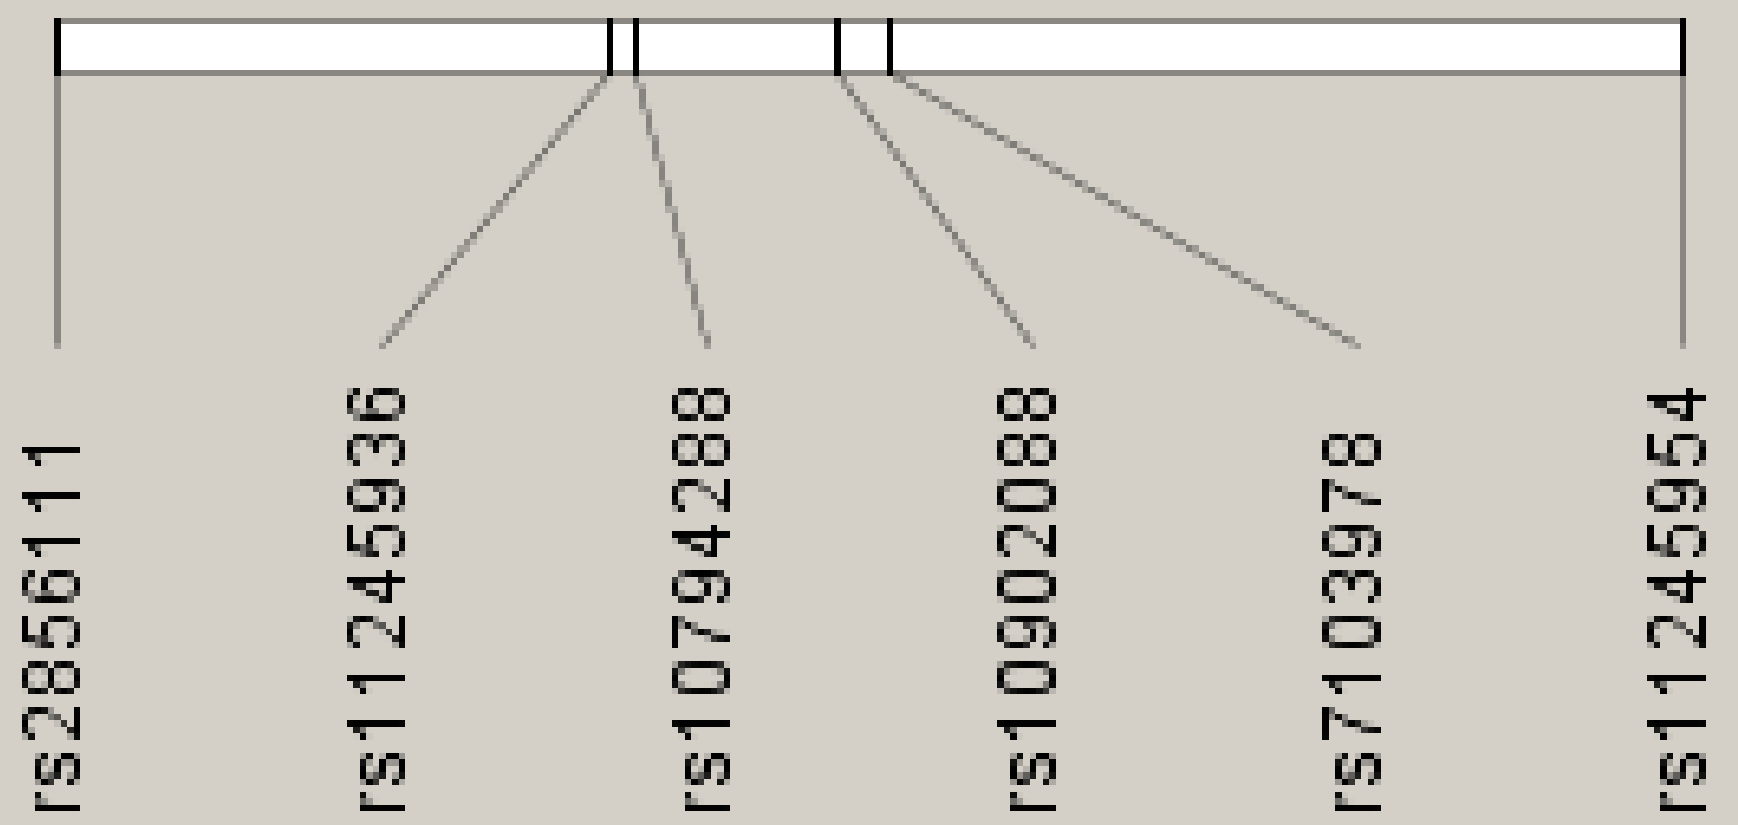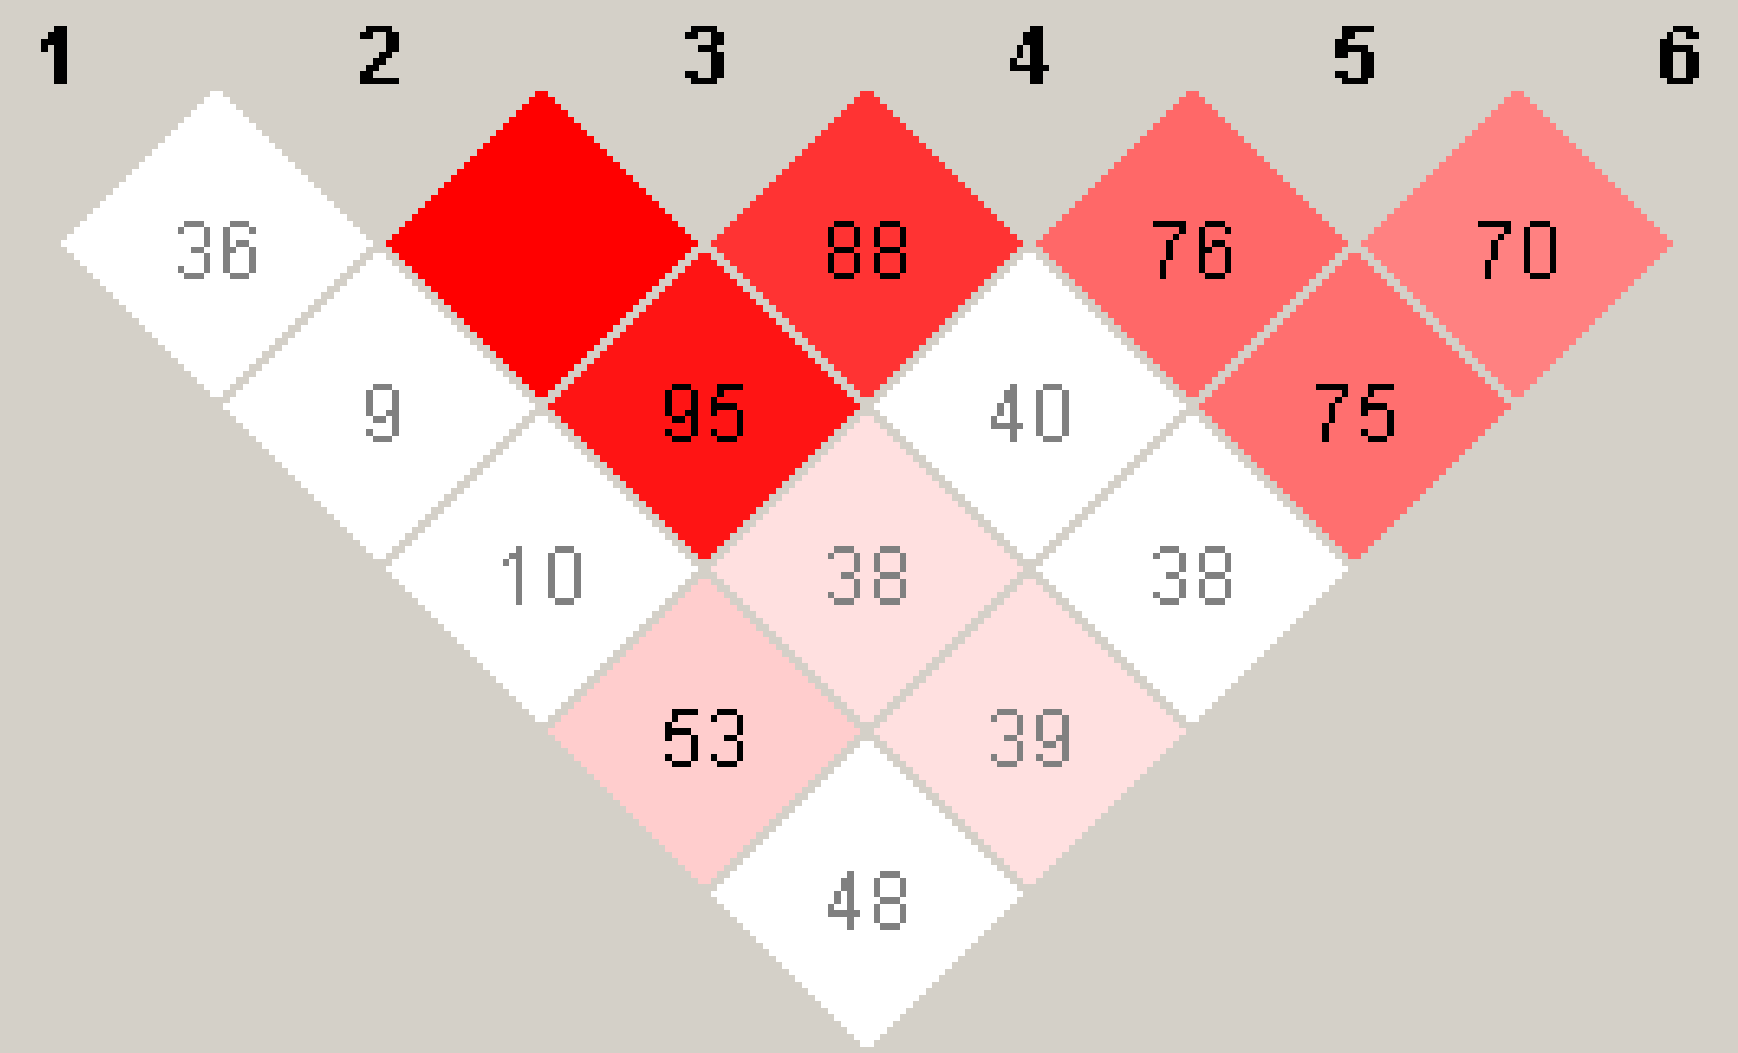**B**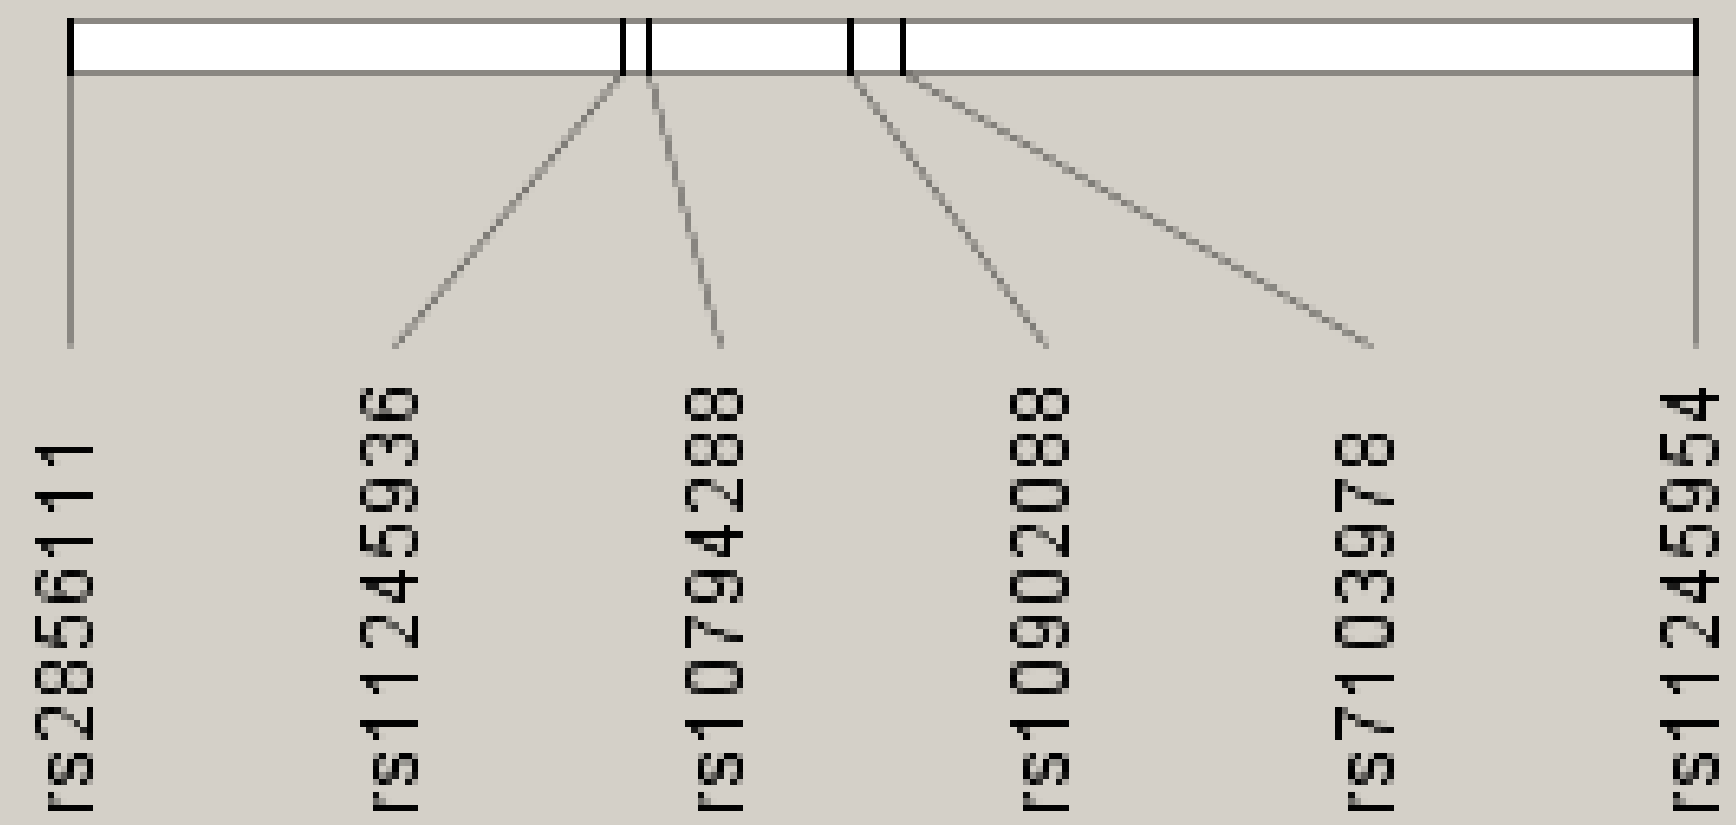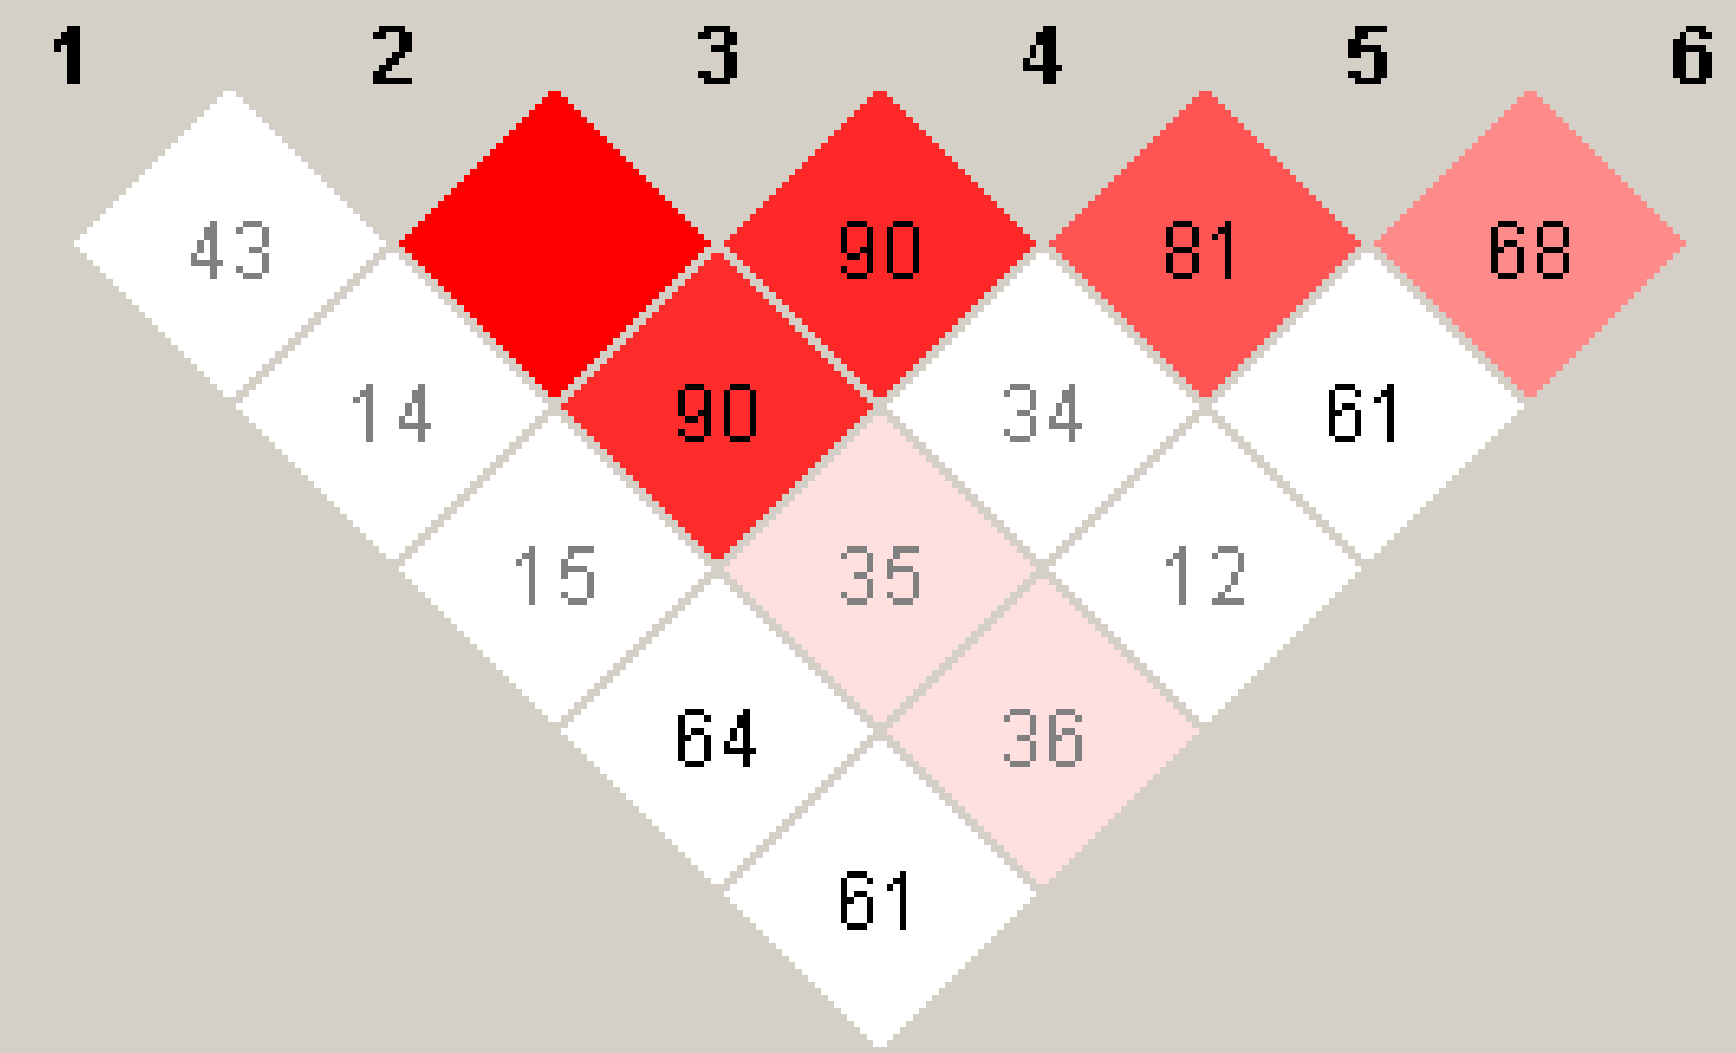

Supplement: MOESM2 [file 9451584]
